# Supplementary material for: Modelling the Distribution of Forest-Dependent Species in Human-Dominated Landscapes: Patterns for the Pine Marten in Intensively Cultivated Lowlands
Source: PubMed Central journal article supplement (PMC4930197; doi:10.1371/journal.pone.0158203), 2016-07-01
Supplement: pone.0158203.s002.pdf [file pone.0158203.s002.pdf]

Don Alfonso Rubio Barroso, con D.N.I. nº 02.188.551-D, en calidad de apoderado de la empresa ESRI ESPAÑA SOLUCIONES GEOESPACIALES, S.L. con domicilio en Madrid, calle Emilio Muñoz, 35 - 4ª Planta, 28037 y con C.I.F. nº B86900057.

## AUTORIZA A:

Aritz Ruiz, doctor en el Departamento de Didáctica de la Matemática y de las Ciencias Experimentales de la UPV/EHU, a poder publicar en la revista científica PLOS One, unas figuras o representaciones cartográficas creadas a partir de mapa base o basemap (concretamente el World Topographic) propiedad de Esri.

Y para que conste a los efectos oportunos firmo la presente en Madrid, a 26 de abril de 2016.



Fdo.: Alfonso Rubio Barroso  
Consejero Delegado
